# Supplementary material for: Computer-aided diagnosis of lung nodule classification between benign nodule, primary lung cancer, and metastatic lung cancer at different image size using deep convolutional neural network with transfer learning
Source: PLoS One. 2018 Jul 27;13(7):e0200721. doi: 10.1371/journal.pone.0200721 (PMC6063408; doi:10.1371/journal.pone.0200721)
Supplement: S1 Table — Raw results of CADx by DCNN with transfer learning in optimal hyperparameters. (XLSX) [file pone.0200721.s001.xlsx]

## Sheet: Title
S1_Table.
Raw results of CADx by DCNN with transfer learning
in optimal hyperparameters

## Sheet: L56_with_transfer_learning
	Accuracy (%)	Loss	Validation Accuracy (%)	Validation Loss
1	0.661561	0.739316	0.626016	0.827952
2	0.659249	0.743286	0.601626	0.843442
3	0.644099	0.771026	0.609756	0.786179
4	0.665566	0.729502	0.585366	0.887079
5	0.647525	0.766157	0.609756	0.805475
6	0.657887	0.744942	0.593496	0.777657
7	0.664451	0.75186	0.642276	0.752865
8	0.651819	0.744274	0.552846	0.867848
9	0.655658	0.744733	0.609756	0.88852
10	0.662428	0.741119	0.642276	0.784282
Average	0.657024	0.747622	0.607317	0.82213
optimal paramter: L=56, E=20, R=0.00002, V=4, F=384, D=0.6

## Sheet: L112_with_transfer__learning
	Accuracy (%)	Loss	Validation Accuracy (%)	Validation Loss
1	0.733518	0.61322	0.593496	0.802585
2	0.734013	0.618443	0.666667	0.830396
3	0.729596	0.619997	0.626016	0.7911
4	0.72877	0.621505	0.691057	0.76932
5	0.717748	0.640142	0.707317	0.636254
6	0.712463	0.652901	0.666667	0.746193
7	0.726376	0.625973	0.650406	0.790627
8	0.738843	0.612019	0.650406	0.809526
9	0.730999	0.616129	0.626016	0.835662
10	0.743219	0.597307	0.593496	0.822734
Average	0.729555	0.621764	0.647154	0.78344
optimal paramter: L=112, E=20, R=0.00002, V=11, F=384, D=0.4

## Sheet: L224_with_transfer_learning
	Accuracy (%)	Loss	Validation Accuracy (%)	Validation Loss
1	0.734501	0.614629	0.691057	0.703964
2	0.737961	0.606929	0.617886	0.853582
3	0.736208	0.608823	0.739837	0.736258
4	0.726325	0.631591	0.707317	0.683327
5	0.740297	0.60456	0.682927	0.760151
6	0.739802	0.606055	0.658537	0.853936
7	0.728257	0.61421	0.707317	0.730612
8	0.736343	0.603935	0.650407	0.825736
9	0.736748	0.611398	0.682927	0.81648
10	0.740252	0.592429	0.658537	0.776126
Average	0.735669	0.609456	0.679675	0.774017
optimal paramter: L=224, E=20, R=0.00002, V=11, F=384, D=0.4
