# Supplementary material for: Computer-aided diagnosis of lung nodule classification between benign nodule, primary lung cancer, and metastatic lung cancer at different image size using deep convolutional neural network with transfer learning
Source: PLoS One. 2018 Jul 27;13(7):e0200721. doi: 10.1371/journal.pone.0200721 (PMC6063408; doi:10.1371/journal.pone.0200721)
Supplement: S2 Table — Raw results of CADx by DCNN without transfer learning in optimal hyperparameters. (XLSX) [file pone.0200721.s002.xlsx]

## Sheet: Title
S2_Table
Raw results of CADx by DCNN without transfer learning
in optimal hyperparameters

## Sheet: L56_without_transfer_learning
	Accuracy (%)	Loss	Validation Accuracy (%)	Validation Loss
1	0.638593	0.78559	0.544715	0.897653
2	0.634623	0.786451	0.593496	0.877802
3	0.622716	0.804742	0.617886	0.856
4	0.628132	0.803366	0.634146	0.781485
5	0.619201	0.822015	0.617886	0.828509
6	0.624866	0.805614	0.658537	0.802638
7	0.628463	0.804338	0.650406	0.847068
8	0.64835	0.774087	0.520325	0.895602
9	0.630158	0.798726	0.585366	0.832119
10	0.624824	0.808389	0.593496	0.815787
Average	0.629993	0.799332	0.601626	0.843466
optimal paramter: L=56, E=30, R=0.0007, V=0, F=384, D=0.6

## Sheet: L112_without_transfer_learning
	Accuracy (%)	Loss	Validation Accuracy (%)	Validation Loss
1	0.688043	0.685726	0.601626	0.855108
2	0.676962	0.698265	0.691057	0.675157
3	0.678574	0.703745	0.577236	0.836948
4	0.680807	0.704501	0.682927	0.747671
5	0.701522	0.667358	0.601626	0.846647
6	0.700198	0.659446	0.544715	0.936157
7	0.678822	0.702299	0.682927	0.872326
8	0.688373	0.687612	0.626016	0.765882
9	0.703299	0.661274	0.577236	0.913432
10	0.688373	0.696096	0.650407	0.790186
Average	0.688497	0.686632	0.623577	0.823951
optimal paramter: L=112, E=25, R=0.001, V=0, F=384, D=0.4

## Sheet: L224_without_transfer_learning
	Accuracy (%)	Loss	Validation Accuracy (%)	Validation Loss
1	0.633383	0.802728	0.609756	0.913626
2	0.635037	0.785553	0.552846	0.948909
3	0.629124	0.7966	0.560976	0.882741
4	0.633466	0.805864	0.544715	0.870332
5	0.65695	0.747931	0.552845	0.8957
6	0.634044	0.809074	0.560976	0.863845
7	0.648888	0.76506	0.634146	0.812226
8	0.641611	0.79578	0.593496	0.839979
9	0.63115	0.791061	0.658537	0.761912
10	0.628752	0.799149	0.626016	0.814368
Average	0.637241	0.78988	0.589431	0.860364
optimal paramter: L=224, E=15, R=0.001, V=0, F=384, D=0.4
