# Supplementary material for: Computer-aided diagnosis of lung nodule classification between benign nodule, primary lung cancer, and metastatic lung cancer at different image size using deep convolutional neural network with transfer learning
Source: PLoS One. 2018 Jul 27;13(7):e0200721. doi: 10.1371/journal.pone.0200721 (PMC6063408; doi:10.1371/journal.pone.0200721)
Supplement: S3 Table — Averaged validation loss and validation accuracy of CADx by DCNN with transfer learning in all trials of random search. (XLSX) [file pone.0200721.s003.xlsx]

## Sheet: Title
S3_Table
Averaged validation loss and validation accuracy of CADx by DCNN
with transfer learning in all trials of random search

## Sheet: L56 with transfer Learning
Parameter	Valiation Accuracy (%)	Valiation Loss
l56, e20, r2.5e-05, v4, f384, d0.6	0.604065	0.857597
l56, e20, r2.5e-05, v4, f448, d0.2	0.591057	0.922029
l56, e20, r2.5e-05, v4, f448, d0.4	0.58374	0.865517
l56, e20, r2.5e-05, v4, f576, d0.4	0.569919	0.916091
l56, e20, r2e-05, v11, f384, d0.2	0.577236	0.878799
l56, e20, r2e-05, v11, f576, d0.2	0.595935	0.891039
l56, e20, r2e-05, v4, f384, d0.6	0.607317	0.82213
l56, e20, r2e-05, v4, f512, d0.4	0.578049	0.877479
l56, e20, r2e-05, v4, f640, d0.2	0.572358	0.949455
l56, e20, r2e-05, v7, f576, d0.6	0.590244	0.851309
l56, e25, r2.5e-05, v11, f512, d0.2	0.595122	0.909448
l56, e25, r2.5e-05, v11, f576, d0.2	0.587805	0.933952
l56, e25, r2.5e-05, v11, f640, d0.4	0.576423	0.865011
l56, e25, r2.5e-05, v7, f448, d0.2	0.608943	0.975783
l56, e25, r2.5e-05, v7, f576, d0.2	0.568293	1.01909
l56, e25, r2.5e-05, v7, f640, d0.2	0.585366	0.975936
l56, e25, r2e-05, v11, f576, d0.6	0.56748	0.877587
l56, e25, r2e-05, v4, f384, d0.6	0.594309	0.848257
l56, e25, r2e-05, v7, f384, d0.6	0.588618	0.871071
l56, e30, r2.5e-05, v4, f384, d0.2	0.566667	1.16654
l56, e30, r2.5e-05, v4, f448, d0.2	0.587805	1.06166
l56, e30, r2.5e-05, v4, f512, d0.2	0.586179	1.10773
l56, e30, r2.5e-05, v4, f640, d0.2	0.572358	1.15586
l56, e30, r2e-05, v4, f640, d0.2	0.579675	0.988232
l56, e30, r2e-05, v7, f448, d0.6	0.595122	0.85543

## Sheet: L112 with transfer Learning
Parameter	Valiation Accuracy (%)	Valiation Loss
l112, e20, r2.5e-05, v4, f384, d0.6	0.62439	0.839476
l112, e20, r2.5e-05, v4, f512, d0.2	0.643902	0.921838
l112, e20, r2.5e-05, v4, f576, d0.2	0.604065	0.973509
l112, e20, r2.5e-05, v4, f640, d0.6	0.643089	0.841547
l112, e20, r2.5e-05, v7, f640, d0.6	0.647967	0.803069
l112, e20, r2e-05, v11, f384, d0.4	0.647154	0.78344
l112, e20, r2e-05, v11, f384, d0.6	0.630894	0.823631
l112, e20, r2e-05, v11, f576, d0.6	0.643089	0.792384
l112, e20, r2e-05, v4, f384, d0.4	0.628455	0.844181
l112, e20, r2e-05, v4, f576, d0.4	0.626829	0.829094
l112, e20, r2e-05, v7, f448, d0.6	0.627642	0.83074
l112, e25, r2.5e-05, v11, f384, d0.4	0.60813	0.948513
l112, e25, r2.5e-05, v11, f448, d0.6	0.626829	0.849834
l112, e25, r2.5e-05, v11, f512, d0.6	0.634146	0.845333
l112, e25, r2.5e-05, v4, f640, d0.6	0.605691	0.94889
l112, e25, r2.5e-05, v7, f384, d0.2	0.641463	1.06072
l112, e25, r2e-05, v11, f576, d0.4	0.652846	0.809298
l112, e25, r2e-05, v4, f384, d0.2	0.608943	1.02165
l112, e25, r2e-05, v4, f384, d0.4	0.655285	0.858405
l112, e30, r2.5e-05, v11, f384, d0.2	0.625203	1.09189
l112, e30, r2.5e-05, v11, f512, d0.2	0.639024	1.03538
l112, e30, r2.5e-05, v11, f576, d0.2	0.625203	1.02247
l112, e30, r2.5e-05, v7, f384, d0.6	0.62439	0.971012
l112, e30, r2e-05, v7, f384, d0.2	0.643902	1.0346
l112, e30, r2e-05, v7, f512, d0.6	0.620325	0.858058

## Sheet: L224 with transfer Learning
Parameter	Valiation Accuracy (%)	Valiation Loss
l224, e20, r2.5e-05, v11, f448, d0.6	0.652846	0.79194
l224, e20, r2.5e-05, v11, f640, d0.2	0.636585	0.858934
l224, e20, r2.5e-05, v4, f384, d0.4	0.641463	0.822053
l224, e20, r2.5e-05, v7, f384, d0.2	0.637398	0.903845
l224, e20, r2.5e-05, v7, f512, d0.4	0.670732	0.809985
l224, e20, r2e-05, v11, f384, d0.4	0.679675	0.774017
l224, e20, r2e-05, v4, f576, d0.4	0.62439	0.893695
l224, e20, r2e-05, v4, f640, d0.6	0.645528	0.793308
l224, e20, r2e-05, v7, f512, d0.4	0.634959	0.844222
l224, e25, r2.5e-05, v11, f448, d0.4	0.643089	0.876693
l224, e25, r2.5e-05, v11, f512, d0.4	0.682927	0.792381
l224, e25, r2.5e-05, v11, f576, d0.6	0.670732	0.775307
l224, e25, r2.5e-05, v4, f448, d0.2	0.625203	1.1248
l224, e25, r2.5e-05, v7, f448, d0.2	0.643089	1.00179
l224, e25, r2.5e-05, v7, f576, d0.2	0.660976	0.921456
l224, e25, r2e-05, v4, f448, d0.2	0.626829	0.983779
l224, e25, r2e-05, v4, f448, d0.4	0.650407	0.824227
l224, e25, r2e-05, v7, f640, d0.2	0.618699	0.970762
l224, e30, r2.5e-05, v4, f384, d0.4	0.630894	1.03738
l224, e30, r2.5e-05, v4, f640, d0.4	0.633333	1.12269
l224, e30, r2.5e-05, v7, f512, d0.4	0.652033	0.985819
l224, e30, r2.5e-05, v7, f576, d0.2	0.638211	1.18358
l224, e30, r2e-05, v11, f384, d0.4	0.633333	0.897346
l224, e30, r2e-05, v11, f640, d0.4	0.64065	0.909654
l224, e30, r2e-05, v4, f512, d0.6	0.629268	0.908206
