# Supplementary material for: Computer-aided diagnosis of lung nodule classification between benign nodule, primary lung cancer, and metastatic lung cancer at different image size using deep convolutional neural network with transfer learning
Source: PLoS One. 2018 Jul 27;13(7):e0200721. doi: 10.1371/journal.pone.0200721 (PMC6063408; doi:10.1371/journal.pone.0200721)
Supplement: S4 Table — Averaged validation loss and validation accuracy of CADx by DCNN without transfer learning in all trials of random search. (XLSX) [file pone.0200721.s004.xlsx]

## Sheet: Title
S4_Table
Averaged validation loss and validation accuracy of CADx by DCNN
without transfer learning in all trials of random search

## Sheet: L56 without transfer Learning
Parameter	Valiation Accuracy (%)	Valiation Loss
l56, e10, r0.0015, v0, f384, d0.6	0.558537	0.941427
l56, e10, r0.002, v0, f384, d0.6	0.55935	0.905767
l56, e15, r0.0007, v0, f384, d0.6	0.545528	0.923558
l56, e15, r0.0015, v0, f384, d0.6	0.591057	0.87188
l56, e20, r0.0007, v0, f384, d0.6	0.590244	0.873825
l56, e25, r0.0005, v0, f384, d0.6	0.578049	0.898717
l56, e25, r0.0015, v0, f384, d0.6	0.587805	0.925391
l56, e30, r0.0007, v0, f384, d0.6	0.601626	0.843466
l56, e30, r0.001, v0, f384, d0.6	0.605691	0.853295
l56, e30, r0.002, v0, f384, d0.6	0.604878	1.09588

## Sheet: L112 without transfer Learning
Parameter	Valiation Accuracy (%)	Valiation Loss
l112, e10, r0.0005, v0, f384, d0.4	0.529268	0.959068
l112, e10, r0.0015, v0, f384, d0.4	0.614634	0.839857
l112, e15, r0.001, v0, f384, d0.4	0.604878	0.867646
l112, e15, r0.002, v0, f384, d0.4	0.605691	0.889021
l112, e20, r0.0005, v0, f384, d0.4	0.580488	0.901692
l112, e20, r0.0007, v0, f384, d0.4	0.608943	0.850812
l112, e25, r0.0007, v0, f384, d0.4	0.58374	0.881438
l112, e25, r0.001, v0, f384, d0.4	0.623577	0.823951
l112, e25, r0.0015, v0, f384, d0.4	0.603252	1.02433
l112, e30, r0.0005, v0, f384, d0.4	0.587805	0.911678

## Sheet: L224 without transfer Learning
Parameter	Valiation Accuracy (%)	Valiation Loss
l224, e10, r0.0005, v0, f384, d0.4	0.527642	0.952159
l224, e10, r0.0007, v0, f384, d0.4	0.556911	0.902078
l224, e10, r0.001, v0, f384, d0.4	0.6	0.863724
l224, e15, r0.001, v0, f384, d0.4	0.589431	0.860364
l224, e15, r0.0015, v0, f384, d0.4	0.59187	0.885759
l224, e15, r0.002, v0, f384, d0.4	0.615447	0.868446
l224, e20, r0.002, v0, f384, d0.4	0.619512	1.04365
l224, e25, r0.0005, v0, f384, d0.4	0.598374	0.878846
l224, e25, r0.0007, v0, f384, d0.4	0.621138	0.86975
l224, e30, r0.0015, v0, f384, d0.4	0.589431	1.47558
